# Supplementary material
Source: PubMed Central journal article supplement (PMC4694292)
Supplement: ijcem0008-17977-f5.pdf [file ijcem0008-17977-f5.pdf]

## Vasectomy and prostate cancer risk

**Table S1.** Methodologic quality of cohort studies included in the meta-analysis

| Study and year      | Selection                                |                                   |                           | Comparability                                                            |                               |                                       | Outcome               |                                                 | Total quality scores |                                  |
|---------------------|------------------------------------------|-----------------------------------|---------------------------|--------------------------------------------------------------------------|-------------------------------|---------------------------------------|-----------------------|-------------------------------------------------|----------------------|----------------------------------|
|                     | Representativeness of the exposed cohort | Selection of the unexposed cohort | Ascertainment of exposure | Demonstration that outcome of interest was not present at start of study | Study controls for age/gender | Study controls for additional factors | Assessment of outcome | Was follow-up long enough for outcomes to occur |                      | Adequacy of follow up of cohorts |
| Sidney S, 1991      | ☆                                        | ☆                                 | ☆                         | ☆                                                                        | ☆                             | ☆                                     | -                     | ☆                                               | ☆                    | 8                                |
| Nienhuis H, 1992    | -                                        | ☆                                 | ☆                         | ☆                                                                        | -                             | -                                     | ☆                     | ☆                                               | ☆                    | 6                                |
| Giovannucci E, 1993 | ☆                                        | ☆                                 | ☆                         | ☆                                                                        | -                             | -                                     | ☆                     | -                                               | -                    | 5                                |
| Giovannucci E, 1993 | ☆                                        | ☆                                 | ☆                         | ☆                                                                        | ☆                             | ☆                                     | ☆                     | -                                               | -                    | 7                                |
| Møller H, 1994      | ☆                                        | ☆                                 | ☆                         | ☆                                                                        | -                             | -                                     | ☆                     | -                                               | -                    | 5                                |
| Lynge E, 2002       | -                                        | ☆                                 | ☆                         | ☆                                                                        | -                             | -                                     | ☆                     | ☆                                               | ☆                    | 6                                |
| Rohrmann S, 2005    | ☆                                        | ☆                                 | ☆                         | ☆                                                                        | -                             | -                                     | ☆                     | ☆                                               | ☆                    | 7                                |
| Yong N, 2008        | -                                        | ☆                                 | ☆                         | ☆                                                                        | -                             | -                                     | -                     | ☆                                               | ☆                    | 5                                |
| Romero FR, 2012     | ☆                                        | ☆                                 | ☆                         | ☆                                                                        | -                             | -                                     | ☆                     | ☆                                               | ☆                    | 7                                |
